# Supplementary material for: Functional brain networks related to individual differences in human intelligence at rest
Source: PubMed Central journal article supplement (PMC4999800; doi:10.1038/srep32328), 2016-08-26
Supplement: srep32328-s1.pdf [file srep32328-s1.pdf]

*Supplementary materials*

**Functional brain networks related to individual differences in human intelligence at rest**

Luke J. Hearne<sup>1\*</sup>, Jason B. Mattingley<sup>1,2</sup>, Luca Cocchi<sup>1,3</sup>

<sup>1</sup> Queensland Brain Institute, The University of Queensland, Brisbane, Australia.

<sup>2</sup> School of Psychology, The University of Queensland, Brisbane, Australia.

<sup>3</sup> QIMR Berghofer Medical Research Institute, Brisbane, Australia

Corresponding Author: \* l.hearne@uq.edu.au

**Supplementary Table 1.** Characteristics of studies utilizing complex graph metrics included in the supplementary resting-state meta-analysis.

| Author                | N   | Sample |            | Behavioural measure             | Brain-behaviour relationship                                                 | Analysis type             | Regions of interest               |
|-----------------------|-----|--------|------------|---------------------------------|------------------------------------------------------------------------------|---------------------------|-----------------------------------|
|                       |     | Males  | Age (M±SD) |                                 |                                                                              |                           |                                   |
| Van den Heuvel et al. | 19  | 74%    | 29±7.8     | WAIS                            | Correlation                                                                  | Global efficiency         | Whole brain                       |
| Wang et al.           | 59  | 49%    | 24.6±3.5   | WAIS (Chinese)                  | Correlation                                                                  | Regional Homogeneity      | Whole brain                       |
| Cole et al.           | 94  | 42%    | 22±4.7     | RAPM and CCFT                   | Correlation                                                                  | Global brain connectivity | LPFC                              |
| Yuan et al.           | 284 | 46%    | 22.8±2.4   | RPM                             | Correlation                                                                  | Regional Homogeneity      | Whole brain                       |
| Santaracchi et al.    | 98  | 50%    | 34±14      | WASI                            | Between-group:<br>high, average and<br>low defined by<br>clustering analysis | Global efficiency         | 90 AAL atlas regions <sup>a</sup> |
| Pamplona et al.       | 29  | 52%    | 26.8±5.8   | WAIS<br>(Portuguese-<br>Brazil) | Correlation                                                                  | Local efficiency          | 82 AAL atlas regions <sup>a</sup> |

Note: <sup>a</sup>MNI centroids were used as regions of interest in the case of the AAL template. CCFT = Cattell Culture Fair Test, RPM = Ravens Standard Progressive Matrices, RAPM = Ravens Advanced Progressive Matrices, WAIS = Wechsler adult intelligence scale, WASI = Wechsler abbreviated scale of intelligence, LPFC = lateral prefrontal cortex, AAL = Automated Anatomical Labeling.

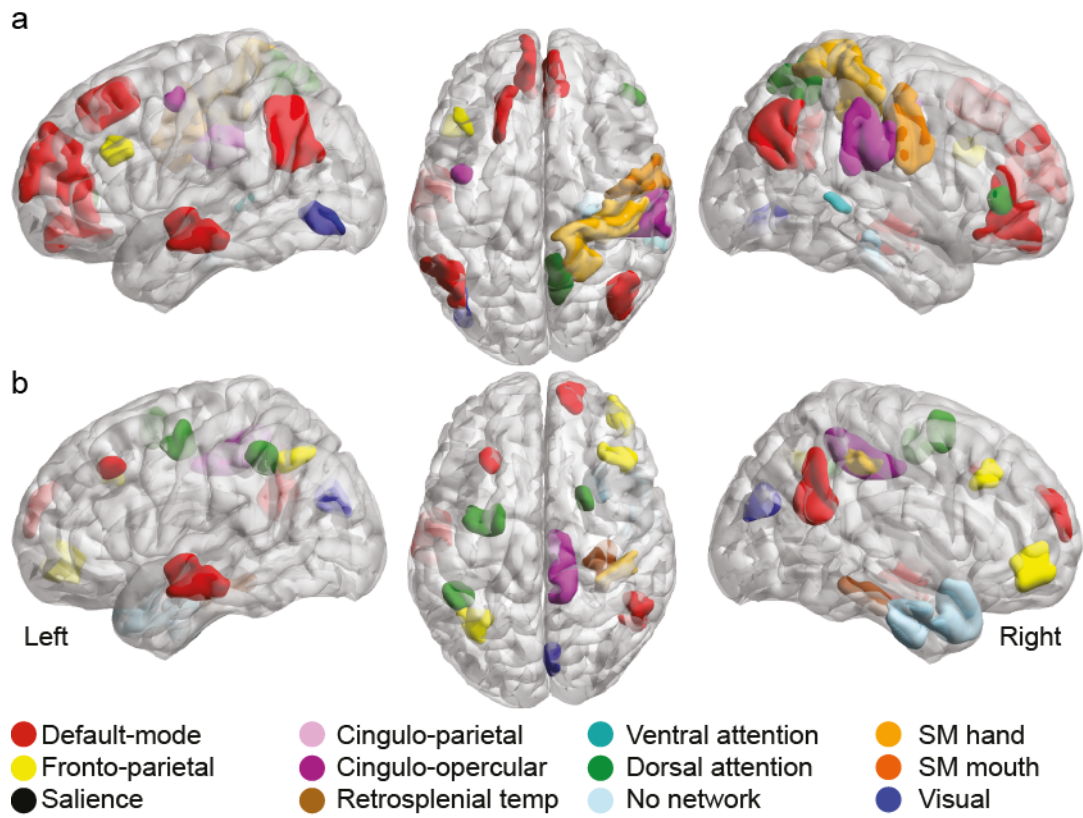

*Supplementary Figure 1.* Regions of the brain that demonstrated global or local graph properties at rest that were associated with intelligence. a. Efficiency metrics b. Regional homogeneity.
